# Supplementary material for: Development and application of a data processing method for food metabolomics analysis
Source: Royal Society of Chemistry journal article supplement (doi:10.1039/d2mo00338d), 2023-05-04
Supplement: d2mo00338d1.pdf [file d2mo00338d1.pdf]

## **Development and application of a data processing method for food metabolomics analysis**

Yuanluo Lei<sup>1</sup>, Xiaoying Chen<sup>1</sup>, Jiachen Shi<sup>1</sup>, Yuanfa Liu<sup>1</sup>, Yong-Jiang Xu<sup>1\*</sup>.

<sup>1</sup> State Key Laboratory of Food Science and Technology, School of Food Science and Technology, National Engineering Research Center for Functional Food, National Engineering Laboratory for Cereal Fermentation Technology, Collaborative Innovation Center of Food Safety and Quality Control in Jiangsu Province, Jiangnan University, No. 1800, Lihu Road, Wuxi 214122, Jiangsu, People's Republic of China.

\*Corresponding author:

Yong-Jiang Xu

Tel: +86 51085913623

Email: [yjxutju@gmail.com](mailto:yjxutju@gmail.com)

The first data comes from a previous article on the study of goat milk fat. We tested the workflow system with raw mass spectrometry data of goat milk fat from a previous study. (<https://dx.doi.org/10.1021/acs.jafc.0c02234>). The second data (mzML) were downloaded from the MetaboLights (MTBLS549). For a number of reasons, we chose a total of 23 data in positive and negative ion mode to test the metabolomic workflows system. Additional details can be found at (<http://www.ebi.ac.uk/metabolights>).

**Table S1.** Triacylglycerols compound identified from workflow A and workflow C.**Workflow A**

| Identifier     | Formula  | Description            | m/z      | rt (min) | Adduction |
|----------------|----------|------------------------|----------|----------|-----------|
| [LMGL03013748] | C51H92O6 | TG<br>(13:0_15:0_20:3) | 818.7305 | 13.69    | M+NH4;1+  |
| [LMGL03013843] | C51H92O6 | TG<br>(13:0_17:0_18:3) | 818.7305 | 13.69    | M+NH4;1+  |
| [LMGL03013842] | C51H92O6 | TG<br>(13:0_17:0_18:3) | 818.7305 | 13.69    | M+NH4;1+  |
| [LMGL03013774] | C51H92O6 | TG<br>(13:0_15:1_20:2) | 818.7305 | 13.69    | M+NH4;1+  |
| [LMGL03013864] | C51H92O6 | TG<br>(13:0_17:1_18:2) | 818.7305 | 13.69    | M+NH4;1+  |
| [LMGL03013885] | C51H92O6 | TG<br>(13:0_17:2_18:1) | 818.7305 | 13.69    | M+NH4;1+  |
| [LMGL03014229] | C51H92O6 | TG<br>(14:0_16:0_18:3) | 818.7305 | 13.69    | M+NH4;1+  |
| [LMGL03014228] | C51H92O6 | TG<br>(14:0_16:0_18:3) | 818.7305 | 13.69    | M+NH4;1+  |
| [LMGL03014154] | C51H92O6 | TG<br>(14:0_14:1_20:2) | 818.7305 | 13.69    | M+NH4;1+  |
| [LMGL03014252] | C51H92O6 | TG<br>(14:0_16:1_18:2) | 818.7305 | 13.69    | M+NH4;1+  |
| [LMGL03014296] | C51H92O6 | TG<br>(14:0_17:1_17:2) | 818.7305 | 13.69    | M+NH4;1+  |
| [LMGL03014985] | C51H92O6 | TG<br>(15:0_15:1_18:2) | 818.7305 | 13.69    | M+NH4;1+  |
| [LMGL03015033] | C51H92O6 | TG<br>(15:0_16:1_17:2) | 818.7305 | 13.69    | M+NH4;1+  |
| [LMGL03013234] | C51H92O6 | TG<br>(12:0_14:0_22:3) | 818.7305 | 13.69    | M+NH4;1+  |
| [LMGL03013444] | C51H92O6 | TG<br>(12:0_18:0_18:3) | 818.7305 | 13.69    | M+NH4;1+  |
| [LMGL03013443] | C51H92O6 | TG<br>(12:0_18:0_18:3) | 818.7305 | 13.69    | M+NH4;1+  |
| [LMGL03013336] | C51H92O6 | TG<br>(12:0_16:0_20:3) | 818.7305 | 13.69    | M+NH4;1+  |
| [LMGL03013262] | C51H92O6 | TG<br>(12:0_14:1_22:2) | 818.7305 | 13.69    | M+NH4;1+  |
| [LMGL03013462] | C51H92O6 | TG<br>(12:0_18:1_18:2) | 818.7305 | 13.69    | M+NH4;1+  |
| [LMGL03013360] | C51H92O6 | TG<br>(12:0_16:1_20:2) | 818.7305 | 13.69    | M+NH4;1+  |

|                   |          |                                   |          |       |          |
|-------------------|----------|-----------------------------------|----------|-------|----------|
| [LMGL03013426]    | C51H92O6 | TG<br>(12:0_17:2_19:1)            | 818.7305 | 13.69 | M+NH4;1+ |
| [LMGL03012718]    | C51H92O6 | TG<br>(13:0_13:0_22:3)            | 818.7305 | 13.69 | M+NH4;1+ |
| [LMGL03012772]    | C51H92O6 | TG<br>(14:0_14:0_20:3)            | 818.7305 | 13.69 | M+NH4;1+ |
| [LMGL03012881]    | C51H92O6 | TG<br>(15:0_15:0_18:3)            | 818.7305 | 13.69 | M+NH4;1+ |
| [LMGL03012880]    | C51H92O6 | TG<br>(15:0_15:0_18:3)            | 818.7305 | 13.69 | M+NH4;1+ |
| [LMGL03012829]    | C51H92O6 | TG<br>(14:1_14:1_20:1)            | 818.7305 | 13.69 | M+NH4;1+ |
| [LMGL03012933]    | C51H92O6 | TG<br>(15:1_15:1_18:1)            | 818.7305 | 13.69 | M+NH4;1+ |
| [LMGL03010020]    | C51H92O6 | TG<br>(16:1/16:1/16:1)            | 818.7305 | 13.69 | M+NH4;1+ |
| [LMGL03014633]    | C51H92O6 | TG<br>(14:1_16:0_18:2)            | 818.7305 | 13.69 | M+NH4;1+ |
| [LMGL03014679]    | C51H92O6 | TG<br>(14:1_17:0_17:2)            | 818.7305 | 13.69 | M+NH4;1+ |
| [LMGL03012847]    | C51H92O6 | TG<br>(14:1_17:1_17:1)            | 818.7305 | 13.69 | M+NH4;1+ |
| [LMGL03014612]    | C51H92O6 | TG<br>(14:1_15:1_19:1)            | 818.7305 | 13.69 | M+NH4;1+ |
| [LMGL03014657]    | C51H92O6 | TG<br>(14:1_16:1_18:1)            | 818.7305 | 13.69 | M+NH4;1+ |
| [LMGL03015359]    | C51H92O6 | TG<br>(15:1_16:0_17:2)            | 818.7305 | 13.69 | M+NH4;1+ |
| [LMGL03015383]    | C51H92O6 | TG<br>(15:1_16:1_17:1)            | 818.7305 | 13.69 | M+NH4;1+ |
| <b>Workflow C</b> |          |                                   |          |       |          |
| [UT000511]        | C51H92O6 | Triacylglycerol<br>14:0-16:1-18:2 | 818.7304 | 13.81 | [M+NH4]+ |

**Table S 2** The information of 442 compounds identified by Workflow B

| Row ID     | Formula        | m/z      | rt (min) | Adduction            |
|------------|----------------|----------|----------|----------------------|
| Row 42#0   | C36H67N3O19    | 846.4419 | 3.00     | [M + H] <sup>+</sup> |
| Row 705#8  | C25H22N2O10S9  | 798.8850 | 15.92    | [M + H] <sup>+</sup> |
| Row 672#6  | C36H38O19      | 775.2117 | 15.46    | [M + H] <sup>+</sup> |
| Row 712#0  | C18H37NO22P4   | 744.0825 | 14.56    | [M + H] <sup>+</sup> |
| Row 591#7  | C20H32N3O21P3  | 744.0820 | 14.47    | [M + H] <sup>+</sup> |
| Row 31#3   | C37H71NO12     | 722.5045 | 2.97     | [M + H] <sup>+</sup> |
| Row 685#1  | C21H22N14O13S  | 711.1264 | 14.90    | [M + H] <sup>+</sup> |
| Row 94#2   | C34H59N7O8     | 694.4493 | 3.50     | [M + H] <sup>+</sup> |
| Row 35#8   | C36H63N5O7     | 678.4783 | 2.94     | [M + H] <sup>+</sup> |
| Row 4#2    | C33H41N11O5    | 672.3414 | 2.62     | [M + H] <sup>+</sup> |
| Row 724#9  | C20H24N8O18    | 665.1268 | 17.68    | [M + H] <sup>+</sup> |
| Row 472#3  | C22H23N11O10P2 | 664.1153 | 11.93    | [M + H] <sup>+</sup> |
| Row 627#10 | C31H28O16      | 657.1476 | 14.94    | [M + H] <sup>+</sup> |
| Row 10#0   | C36H46O11      | 655.3159 | 2.68     | [M + H] <sup>+</sup> |
| Row 26#0   | C27H39N15O5    | 654.3315 | 2.86     | [M + H] <sup>+</sup> |
| Row 597#4  | C25H35NO19     | 654.1844 | 14.30    | [M + H] <sup>+</sup> |
| Row 51#7   | C29H57N5O11    | 652.4105 | 3.40     | [M + H] <sup>+</sup> |
| Row 637#9  | C39H20N2O8     | 645.1299 | 14.60    | [M + H] <sup>+</sup> |
| Row 624#3  | C33H22N4O10    | 635.1396 | 14.87    | [M + H] <sup>+</sup> |
| Row 21#10  | C33H63NO10     | 634.4509 | 2.88     | [M + H] <sup>+</sup> |
| Row 638#10 | C20H32N6O12S2  | 613.1586 | 14.94    | [M + H] <sup>+</sup> |
| Row 51#1   | C27H53N5O10    | 608.3845 | 3.38     | [M + H] <sup>+</sup> |
| Row 502#7  | C23H25N7O5S4   | 608.0877 | 12.62    | [M + H] <sup>+</sup> |
| Row 666#10 | C9H22O22P4     | 606.9613 | 15.75    | [M + H] <sup>+</sup> |
| Row 658#3  | C26H21O17      | 606.0839 | 15.53    | [M + H] <sup>+</sup> |
| Row 660#4  | C26H21O17      | 606.0833 | 15.45    | [M + H] <sup>+</sup> |
| Row 406#3  | C23H29N2O7PS4  | 605.0628 | 11.13    | [M + H] <sup>+</sup> |
| Row 37#0   | C31H54N2O9     | 599.3896 | 2.96     | [M + H] <sup>+</sup> |
| Row 765#0  | C19H19NO17P2   | 596.0187 | 15.79    | [M + H] <sup>+</sup> |
| Row 90#5   | C29H42N10O4    | 595.3477 | 3.70     | [M + H] <sup>+</sup> |
| Row 134#5  | C29H38N10O4    | 591.3165 | 4.20     | [M + H] <sup>+</sup> |
| Row 76#5   | C30H48N6O6     | 589.3700 | 3.53     | [M + H] <sup>+</sup> |
| Row 92#2   | C30H48N6O6     | 589.3700 | 3.47     | [M + H] <sup>+</sup> |
| Row 722#0  | C21H29N6O10PS  | 589.1471 | 14.71    | [M + H] <sup>+</sup> |
| Row 9#2    | C29H32N10O4    | 585.2693 | 2.71     | [M + H] <sup>+</sup> |
| Row 557#7  | C23H21NO17     | 584.0878 | 13.71    | [M + H] <sup>+</sup> |
| Row 406#10 | C26H21O15      | 574.0936 | 10.87    | [M + H] <sup>+</sup> |
| Row 648#6  | C19H21N9O12    | 568.1375 | 15.02    | [M + H] <sup>+</sup> |
| Row 631#1  | C9H19N3O17P2S2 | 567.9691 | 13.80    | [M + H] <sup>+</sup> |
| Row 11#0   | C26H50N2O7P2   | 565.3151 | 2.73     | [M + H] <sup>+</sup> |
| Row 620#7  | C27H24N4O8S    | 565.1375 | 15.00    | [M + H] <sup>+</sup> |

---

|            |                |          |       |                      |
|------------|----------------|----------|-------|----------------------|
| Row 51#10  | C25H49N5O9     | 564.3577 | 3.33  | [M + H] <sup>+</sup> |
| Row 44#3   | C26H49N5O8     | 560.3633 | 3.11  | [M + H] <sup>+</sup> |
| Row 688#2  | C30H19N3O8     | 550.1265 | 14.97 | [M + H] <sup>+</sup> |
| Row 656#7  | C9H18N3O14P3S2 | 549.9515 | 15.89 | [M + H] <sup>+</sup> |
| Row 67#2   | C32H48O7       | 545.3439 | 3.40  | [M + H] <sup>+</sup> |
| Row 570#1  | C29H26O10      | 535.1630 | 12.50 | [M + H] <sup>+</sup> |
| Row 524#9  | C29H26O10      | 535.1628 | 12.55 | [M + H] <sup>+</sup> |
| Row 214#1  | C26H23N7O6     | 530.1794 | 5.54  | [M + H] <sup>+</sup> |
| Row 230#5  | C26H23N7O6     | 530.1791 | 5.44  | [M + H] <sup>+</sup> |
| Row 565#7  | C16H14N5O8P3S  | 529.9834 | 13.91 | [M + H] <sup>+</sup> |
| Row 576#10 | C24H12O14      | 525.0278 | 13.80 | [M + H] <sup>+</sup> |
| Row 785#0  | C12H11N7O13P2  | 523.9976 | 16.51 | [M + H] <sup>+</sup> |
| Row 724#6  | C9H20NO18P3    | 523.9973 | 16.37 | [M + H] <sup>+</sup> |
| Row 56#10  | C23H45N5O8     | 520.3318 | 3.37  | [M + H] <sup>+</sup> |
| Row 642#0  | C24H38N8O5     | 519.3022 | 13.21 | [M + H] <sup>+</sup> |
| Row 442#5  | C25H43N7O4     | 506.3466 | 10.01 | [M + H] <sup>+</sup> |
| Row 269#10 | C30H47O6       | 504.3417 | 6.85  | [M + H] <sup>+</sup> |
| Row 50#5   | C30H44O6       | 501.3179 | 3.43  | [M + H] <sup>+</sup> |
| Row 711#9  | C15H14N8O12    | 499.0789 | 16.51 | [M + H] <sup>+</sup> |
| Row 694#10 | C26H14N2O9     | 499.0787 | 16.45 | [M + H] <sup>+</sup> |
| Row 215#3  | C33H36N2O2     | 493.2803 | 6.22  | [M + H] <sup>+</sup> |
| Row 117#7  | C21H39N5O8     | 490.2850 | 4.23  | [M + H] <sup>+</sup> |
| Row 516#7  | C27H20O9       | 489.1137 | 12.87 | [M + H] <sup>+</sup> |
| Row 48#3   | C27H44N6O2     | 485.3579 | 3.16  | [M + H] <sup>+</sup> |
| Row 720#6  | C22H37N5O7     | 484.2760 | 16.12 | [M + H] <sup>+</sup> |
| Row 560#3  | C31H17NO5      | 484.1163 | 13.74 | [M + H] <sup>+</sup> |
| Row 286#3  | C32H28O4       | 477.2040 | 8.47  | [M + H] <sup>+</sup> |
| Row 64#8   | C21H41N5O7     | 476.3063 | 3.48  | [M + H] <sup>+</sup> |
| Row 56#7   | C21H41N5O7     | 476.3061 | 3.51  | [M + H] <sup>+</sup> |
| Row 39#7   | C23H43N5O5     | 470.3319 | 2.98  | [M + H] <sup>+</sup> |
| Row 831#0  | C19H39N3O10    | 470.2704 | 22.65 | [M + H] <sup>+</sup> |
| Row 610#0  | C24H23NO9      | 470.1437 | 12.70 | [M + H] <sup>+</sup> |
| Row 18#0   | C23H25N5O6     | 468.1910 | 2.81  | [M + H] <sup>+</sup> |
| Row 573#6  | C15H17N9O9     | 468.1215 | 13.77 | [M + H] <sup>+</sup> |
| Row 15#2   | C21H28N3O7P    | 466.1749 | 2.76  | [M + H] <sup>+</sup> |
| Row 725#5  | C8H19N9O14     | 466.1118 | 16.00 | [M + H] <sup>+</sup> |
| Row 135#0  | C24H25N5O5     | 464.1914 | 4.00  | [M + H] <sup>+</sup> |
| Row 592#7  | C16H27N7O9     | 462.1937 | 14.47 | [M + H] <sup>+</sup> |
| Row 546#1  | C28H26O6       | 459.1834 | 12.21 | [M + H] <sup>+</sup> |
| Row 566#2  | C19H26N3O10    | 457.1679 | 12.29 | [M + H] <sup>+</sup> |
| Row 624#2  | C18H20N10O5    | 457.1679 | 13.65 | [M + H] <sup>+</sup> |
| Row 568#10 | C18H20N10O5    | 457.1678 | 13.47 | [M + H] <sup>+</sup> |
| Row 213#8  | C22H31NO9      | 454.2069 | 5.29  | [M + H] <sup>+</sup> |
| Row 15#6   | C22H23N6O3P    | 451.1645 | 2.80  | [M + H] <sup>+</sup> |

---

---

|            |               |          |       |                      |
|------------|---------------|----------|-------|----------------------|
| Row 527#3  | C11H20N3O8PS3 | 450.0180 | 12.89 | [M + H] <sup>+</sup> |
| Row 606#6  | C11H16N10O6S2 | 449.0767 | 14.37 | [M + H] <sup>+</sup> |
| Row 116#3  | C19H35N5O7    | 446.2594 | 4.35  | [M + H] <sup>+</sup> |
| Row 646#10 | C9H19NO15P2   | 444.0310 | 15.39 | [M + H] <sup>+</sup> |
| Row 598#6  | C22H20N2O6S   | 441.1107 | 14.12 | [M + H] <sup>+</sup> |
| Row 122#8  | C22H37N3O6    | 440.2772 | 4.36  | [M + H] <sup>+</sup> |
| Row 61#7   | C19H37N5O6    | 432.2800 | 3.54  | [M + H] <sup>+</sup> |
| Row 25#3   | C25H29N5O2    | 432.2379 | 3.01  | [M + H] <sup>+</sup> |
| Row 511#7  | C15H10N8O8    | 431.0719 | 12.77 | [M + H] <sup>+</sup> |
| Row 397#8  | C14H17N7O9    | 428.1153 | 10.28 | [M + H] <sup>+</sup> |
| Row 527#6  | C9H19NO14P2   | 428.0363 | 12.81 | [M + H] <sup>+</sup> |
| Row 615#8  | C13H22N4O8S2  | 427.0952 | 14.46 | [M + H] <sup>+</sup> |
| Row 170#0  | C24H43NO5     | 426.3214 | 4.51  | [M + H] <sup>+</sup> |
| Row 128#6  | C24H43NO5     | 426.3213 | 4.42  | [M + H] <sup>+</sup> |
| Row 33#1   | C21H39N5O4    | 426.3061 | 2.97  | [M + H] <sup>+</sup> |
| Row 713#8  | C7H13N13O9    | 424.1021 | 16.12 | [M + H] <sup>+</sup> |
| Row 510#8  | C12H19N7O10   | 422.1260 | 11.99 | [M + H] <sup>+</sup> |
| Row 14#1   | C21H29N5O4    | 416.2275 | 2.83  | [M + H] <sup>+</sup> |
| Row 71#7   | C19H34N4O6    | 415.2535 | 3.58  | [M + H] <sup>+</sup> |
| Row 24#7   | C25H26N4O2    | 415.2113 | 2.98  | [M + H] <sup>+</sup> |
| Row 340#8  | C22H24N4O4    | 409.1870 | 9.05  | [M + H] <sup>+</sup> |
| Row 611#5  | C9H24N6O12    | 409.1531 | 12.85 | [M + H] <sup>+</sup> |
| Row 660#0  | C19H35O9      | 408.2341 | 13.75 | [M + H] <sup>+</sup> |
| Row 262#4  | C17H26N8O4    | 407.2127 | 6.70  | [M + H] <sup>+</sup> |
| Row 724#2  | C9H14N2O16    | 407.0424 | 15.43 | [M + H] <sup>+</sup> |
| Row 42#8   | C22H29NO6     | 404.2072 | 3.08  | [M + H] <sup>+</sup> |
| Row 100#0  | C17H33N5O5    | 388.2541 | 3.67  | [M + H] <sup>+</sup> |
| Row 43#6   | C26H26O3      | 387.1925 | 3.00  | [M + H] <sup>+</sup> |
| Row 148#5  | C19H37N4O4    | 386.2895 | 4.34  | [M + H] <sup>+</sup> |
| Row 456#10 | C18H19N5O5    | 386.1457 | 11.52 | [M + H] <sup>+</sup> |
| Row 423#7  | C9H20N8O7S    | 385.1283 | 11.24 | [M + H] <sup>+</sup> |
| Row 26#1   | C19H35N5O3    | 382.2798 | 2.97  | [M + H] <sup>+</sup> |
| Row 715#3  | C9H30N10O4S   | 375.2234 | 16.90 | [M + H] <sup>+</sup> |
| Row 511#9  | C16H30N4O6    | 375.2231 | 12.17 | [M + H] <sup>+</sup> |
| Row 103#0  | C17H30N4O5    | 371.2277 | 3.64  | [M + H] <sup>+</sup> |
| Row 104#5  | C21H39NO4     | 370.2946 | 3.77  | [M + H] <sup>+</sup> |
| Row 312#10 | C22H27NO4     | 370.1998 | 8.21  | [M + H] <sup>+</sup> |
| Row 700#7  | C18H32N4O4    | 369.2489 | 21.25 | [M + H] <sup>+</sup> |
| Row 105#4  | C21H37NO4     | 368.2789 | 3.86  | [M + H] <sup>+</sup> |
| Row 348#5  | C17H22N2O7    | 367.1492 | 8.16  | [M + H] <sup>+</sup> |
| Row 706#10 | C13H22N2O10   | 367.1341 | 17.66 | [M + H] <sup>+</sup> |
| Row 10#1   | C20H31N2O2P   | 363.2198 | 2.79  | [M + H] <sup>+</sup> |
| Row 495#3  | C21H20N4O2    | 361.1649 | 12.22 | [M + H] <sup>+</sup> |
| Row 305#8  | C20H23NO5     | 358.1667 | 7.51  | [M + H] <sup>+</sup> |

---

---

|            |              |          |       |                      |
|------------|--------------|----------|-------|----------------------|
| Row 592#0  | C24H21O3     | 358.1543 | 12.45 | [M + H] <sup>+</sup> |
| Row 821#0  | C17H32N4O4   | 357.2496 | 21.61 | [M + H] <sup>+</sup> |
| Row 740#4  | C17H32N4O4   | 357.2491 | 21.41 | [M + H] <sup>+</sup> |
| Row 334#6  | C7H19N11O6   | 354.1565 | 9.25  | [M + H] <sup>+</sup> |
| Row 639#5  | C16H26N6O3   | 351.2121 | 13.53 | [M + H] <sup>+</sup> |
| Row 545#3  | C8H22N12O4   | 351.1983 | 13.38 | [M + H] <sup>+</sup> |
| Row 226#3  | C14H21O10    | 350.1206 | 6.59  | [M + H] <sup>+</sup> |
| Row 266#5  | C14H21O10    | 350.1205 | 6.36  | [M + H] <sup>+</sup> |
| Row 448#3  | C12H20N4O4S2 | 349.0996 | 11.69 | [M + H] <sup>+</sup> |
| Row 439#3  | C9H18NO11P   | 348.0701 | 11.60 | [M + H] <sup>+</sup> |
| Row 425#7  | C9H18NO11P   | 348.0699 | 11.38 | [M + H] <sup>+</sup> |
| Row 533#7  | C8H18N12O4   | 347.1669 | 13.02 | [M + H] <sup>+</sup> |
| Row 102#1  | C20H33N5     | 344.2791 | 4.05  | [M + H] <sup>+</sup> |
| Row 427#1  | C9H22N5O7P   | 344.1339 | 10.57 | [M + H] <sup>+</sup> |
| Row 445#5  | C16H17N5O4   | 344.1336 | 10.21 | [M + H] <sup>+</sup> |
| Row 722#3  | C9H9N7O8     | 344.0586 | 17.71 | [M + H] <sup>+</sup> |
| Row 108#1  | C19H35NO4    | 342.2636 | 4.14  | [M + H] <sup>+</sup> |
| Row 659#10 | C8H9N2O11P   | 341.0029 | 15.60 | [M + H] <sup>+</sup> |
| Row 675#2  | C8H15N6O7S   | 340.0805 | 14.53 | [M + H] <sup>+</sup> |
| Row 613#10 | C10H19N3O6P2 | 340.0803 | 14.49 | [M + H] <sup>+</sup> |
| Row 354#7  | C9H22N8O6    | 339.1756 | 9.68  | [M + H] <sup>+</sup> |
| Row 651#0  | C15H24N6O3   | 337.1972 | 13.49 | [M + H] <sup>+</sup> |
| Row 644#10 | C14H26NO8    | 337.1713 | 15.14 | [M + H] <sup>+</sup> |
| Row 398#4  | C9H12N4O10   | 337.0637 | 10.71 | [M + H] <sup>+</sup> |
| Row 556#10 | C8H17N9O6    | 336.1395 | 13.22 | [M + H] <sup>+</sup> |
| Row 459#8  | C9H21N2O7PS  | 333.0863 | 11.45 | [M + H] <sup>+</sup> |
| Row 199#0  | C20H31N2O2   | 332.2431 | 4.67  | [M + H] <sup>+</sup> |
| Row 148#10 | C17H33NO5    | 332.2426 | 4.41  | [M + H] <sup>+</sup> |
| Row 284#4  | C19H25NO2S   | 332.1696 | 7.31  | [M + H] <sup>+</sup> |
| Row 481#0  | C15H23O8     | 332.1455 | 10.84 | [M + H] <sup>+</sup> |
| Row 364#7  | C15H23O8     | 332.1447 | 9.93  | [M + H] <sup>+</sup> |
| Row 261#8  | C16H17N5O3   | 328.1390 | 6.57  | [M + H] <sup>+</sup> |
| Row 244#7  | C16H17N5O3   | 328.1386 | 6.46  | [M + H] <sup>+</sup> |
| Row 111#2  | C15H26N4O4   | 327.2011 | 3.62  | [M + H] <sup>+</sup> |
| Row 604#10 | C9H22N8O5    | 323.1813 | 14.24 | [M + H] <sup>+</sup> |
| Row 756#5  | C9H13N4O9    | 322.0766 | 17.72 | [M + H] <sup>+</sup> |
| Row 298#6  | C15H24N6O2   | 321.2018 | 8.60  | [M + H] <sup>+</sup> |
| Row 310#7  | C15H24N6O2   | 321.2016 | 8.49  | [M + H] <sup>+</sup> |
| Row 285#2  | C17H22N2O4   | 319.1649 | 6.07  | [M + H] <sup>+</sup> |
| Row 434#3  | C14H21O8     | 318.1295 | 11.51 | [M + H] <sup>+</sup> |
| Row 415#7  | C14H21O8     | 318.1292 | 11.29 | [M + H] <sup>+</sup> |
| Row 116#1  | C18H29N5     | 316.2479 | 4.38  | [M + H] <sup>+</sup> |
| Row 39#1   | C17H25N5O    | 316.2118 | 3.14  | [M + H] <sup>+</sup> |
| Row 165#0  | C17H31NO4    | 314.2327 | 4.51  | [M + H] <sup>+</sup> |

---



---

|            |              |          |       |                      |
|------------|--------------|----------|-------|----------------------|
| Row 123#1  | C17H31NO4    | 314.2326 | 4.38  | [M + H] <sup>+</sup> |
| Row 540#7  | C9H17N4O8    | 310.1131 | 13.52 | [M + H] <sup>+</sup> |
| Row 628#5  | C9H17N4O8    | 310.1130 | 13.48 | [M + H] <sup>+</sup> |
| Row 605#4  | C8H20N8O5    | 309.1655 | 14.36 | [M + H] <sup>+</sup> |
| Row 689#7  | C13H20N6O3   | 309.1654 | 18.62 | [M + H] <sup>+</sup> |
| Row 655#4  | C8H20N8O5    | 309.1653 | 15.31 | [M + H] <sup>+</sup> |
| Row 444#4  | C9H18N5O7    | 309.1288 | 11.47 | [M + H] <sup>+</sup> |
| Row 143#6  | C17H25NO4    | 308.1856 | 4.51  | [M + H] <sup>+</sup> |
| Row 577#0  | C8H15N6O5S   | 308.0910 | 12.05 | [M + H] <sup>+</sup> |
| Row 771#0  | C8H23N2O4P2S | 306.0932 | 15.90 | [M + H] <sup>+</sup> |
| Row 575#1  | C18H11NO4    | 306.0752 | 12.54 | [M + H] <sup>+</sup> |
| Row 181#3  | C16H25N5O    | 304.2117 | 5.24  | [M + H] <sup>+</sup> |
| Row 474#10 | C9H19O7PS    | 303.0675 | 11.70 | [M + H] <sup>+</sup> |
| Row 104#1  | C16H23N5O    | 302.1961 | 4.14  | [M + H] <sup>+</sup> |
| Row 112#7  | C9H23N4O5P   | 299.1489 | 4.13  | [M + H] <sup>+</sup> |
| Row 8#4    | C9H22N4O5S   | 299.1389 | 2.75  | [M + H] <sup>+</sup> |
| Row 720#10 | C13H23N5O3   | 298.1869 | 20.19 | [M + H] <sup>+</sup> |
| Row 155#7  | C9H20N3O4PS  | 298.0965 | 4.62  | [M + H] <sup>+</sup> |
| Row 556#3  | C8H15N4O8    | 296.0976 | 13.69 | [M + H] <sup>+</sup> |
| Row 563#10 | C8H15N4O8    | 296.0974 | 13.47 | [M + H] <sup>+</sup> |
| Row 625#7  | C9H20N5O6    | 295.1500 | 15.13 | [M + H] <sup>+</sup> |
| Row 601#3  | C9H20N5O6    | 295.1500 | 14.48 | [M + H] <sup>+</sup> |
| Row 238#3  | C13H19N5O3   | 294.1545 | 6.85  | [M + H] <sup>+</sup> |
| Row 534#4  | C6H16N10O4   | 293.1451 | 12.39 | [M + H] <sup>+</sup> |
| Row 632#7  | C12H22N2O6   | 291.1551 | 15.33 | [M + H] <sup>+</sup> |
| Row 482#8  | C9H16N5O6    | 291.1190 | 11.76 | [M + H] <sup>+</sup> |
| Row 438#7  | C9H16N5O6    | 291.1186 | 11.43 | [M + H] <sup>+</sup> |
| Row 423#10 | C9H17N6O5    | 290.1344 | 11.21 | [M + H] <sup>+</sup> |
| Row 117#6  | C19H31N2     | 288.2533 | 4.15  | [M + H] <sup>+</sup> |
| Row 47#5   | C19H31N2     | 288.2532 | 3.12  | [M + H] <sup>+</sup> |
| Row 143#1  | C15H27NO4    | 286.2012 | 4.60  | [M + H] <sup>+</sup> |
| Row 158#10 | C15H27NO4    | 286.2008 | 4.50  | [M + H] <sup>+</sup> |
| Row 65#0   | C9H23N3O5S   | 286.1439 | 3.23  | [M + H] <sup>+</sup> |
| Row 219#7  | C5H16N7O5P   | 286.1031 | 5.65  | [M + H] <sup>+</sup> |
| Row 749#2  | C5H6N3O9P    | 283.9927 | 15.78 | [M + H] <sup>+</sup> |
| Row 100#5  | C8H22N6O5    | 283.1749 | 3.77  | [M + H] <sup>+</sup> |
| Row 75#3   | C15H15N5O    | 282.1371 | 3.54  | [M + H] <sup>+</sup> |
| Row 196#7  | C7H11N11O2   | 282.1194 | 5.12  | [M + H] <sup>+</sup> |
| Row 400#7  | C8H17N4O7    | 282.1185 | 11.15 | [M + H] <sup>+</sup> |
| Row 192#3  | C8H21N7O2S   | 280.1543 | 5.63  | [M + H] <sup>+</sup> |
| Row 203#1  | C9H22N5O3P   | 280.1542 | 5.46  | [M + H] <sup>+</sup> |
| Row 316#6  | C9H19N4O6    | 280.1390 | 9.06  | [M + H] <sup>+</sup> |
| Row 188#8  | C9H23N7OS    | 278.1749 | 4.99  | [M + H] <sup>+</sup> |
| Row 426#5  | C9H17N4O6    | 278.1231 | 9.53  | [M + H] <sup>+</sup> |

---

---

|            |             |          |       |                      |
|------------|-------------|----------|-------|----------------------|
| Row 597#10 | C7H12N5O5P  | 278.0631 | 14.13 | [M + H] <sup>+</sup> |
| Row 242#3  | C9H21N7O3   | 276.1804 | 6.79  | [M + H] <sup>+</sup> |
| Row 307#2  | C9H21N7O3   | 276.1802 | 6.49  | [M + H] <sup>+</sup> |
| Row 405#7  | C9H13N4O6   | 274.0915 | 11.15 | [M + H] <sup>+</sup> |
| Row 161#7  | C15H21N5    | 272.1853 | 4.57  | [M + H] <sup>+</sup> |
| Row 282#1  | C7H10N8O4   | 271.0922 | 6.69  | [M + H] <sup>+</sup> |
| Row 551#0  | C9H17NO8    | 268.1026 | 11.87 | [M + H] <sup>+</sup> |
| Row 174#3  | C15H21O4    | 266.1513 | 5.14  | [M + H] <sup>+</sup> |
| Row 456#0  | C8H17N4O6   | 266.1233 | 10.56 | [M + H] <sup>+</sup> |
| Row 386#10 | C8H17N4O6   | 266.1230 | 10.44 | [M + H] <sup>+</sup> |
| Row 145#8  | C9H19N3O4P  | 265.1183 | 4.47  | [M + H] <sup>+</sup> |
| Row 184#0  | C9H19N3O4P  | 265.1182 | 4.59  | [M + H] <sup>+</sup> |
| Row 524#10 | C7H11N4O5P  | 263.0522 | 12.58 | [M + H] <sup>+</sup> |
| Row 311#9  | C8H19N7O3   | 262.1644 | 8.22  | [M + H] <sup>+</sup> |
| Row 408#4  | C9H17N4O5   | 262.1282 | 11.01 | [M + H] <sup>+</sup> |
| Row 350#9  | C9H17N4O5   | 262.1281 | 9.15  | [M + H] <sup>+</sup> |
| Row 590#3  | C8H8N2O8    | 261.0369 | 14.28 | [M + H] <sup>+</sup> |
| Row 191#9  | C9H21N7O2   | 260.1852 | 4.90  | [M + H] <sup>+</sup> |
| Row 535#5  | C8H20N6P    | 258.1097 | 11.49 | [M + H] <sup>+</sup> |
| Row 482#7  | C9H16N5O2P  | 258.1097 | 12.18 | [M + H] <sup>+</sup> |
| Row 284#0  | C9H14N5O4   | 257.1131 | 6.68  | [M + H] <sup>+</sup> |
| Row 240#6  | C9H14N5O4   | 257.1130 | 6.44  | [M + H] <sup>+</sup> |
| Row 238#5  | C9H14N6O3   | 255.1222 | 5.44  | [M + H] <sup>+</sup> |
| Row 196#5  | C9H14N7O2   | 253.1279 | 4.74  | [M + H] <sup>+</sup> |
| Row 386#5  | C8H18N3O4S  | 253.1085 | 8.84  | [M + H] <sup>+</sup> |
| Row 410#4  | C9H17NO7    | 252.1074 | 11.15 | [M + H] <sup>+</sup> |
| Row 491#4  | C8H6N6O2S   | 251.0361 | 11.93 | [M + H] <sup>+</sup> |
| Row 667#7  | C8H11NO6S   | 250.0377 | 16.28 | [M + H] <sup>+</sup> |
| Row 311#3  | C9H19N4O4   | 248.1489 | 9.12  | [M + H] <sup>+</sup> |
| Row 237#1  | C14H18N2O2  | 247.1438 | 6.03  | [M + H] <sup>+</sup> |
| Row 577#7  | C9H14N2O6   | 247.0935 | 14.01 | [M + H] <sup>+</sup> |
| Row 756#3  | C9H21N6O2   | 246.1810 | 23.14 | [M + H] <sup>+</sup> |
| Row 215#6  | C12H21NO4   | 244.1541 | 5.87  | [M + H] <sup>+</sup> |
| Row 284#6  | C6H20N4O2PS | 244.1111 | 8.05  | [M + H] <sup>+</sup> |
| Row 345#4  | C6H20N4O2PS | 244.1109 | 9.66  | [M + H] <sup>+</sup> |
| Row 341#0  | C8H23N3O3P  | 241.1545 | 7.73  | [M + H] <sup>+</sup> |
| Row 387#7  | C8H23N3O3P  | 241.1544 | 10.37 | [M + H] <sup>+</sup> |
| Row 380#3  | C8H23N3O3P  | 241.1544 | 10.55 | [M + H] <sup>+</sup> |
| Row 279#9  | C8H23N3O3P  | 241.1542 | 7.43  | [M + H] <sup>+</sup> |
| Row 104#10 | C8H20N3O5   | 239.1486 | 3.88  | [M + H] <sup>+</sup> |
| Row 759#6  | C9H18O7     | 239.1136 | 20.20 | [M + H] <sup>+</sup> |
| Row 287#6  | C9H14N6S    | 239.1058 | 8.37  | [M + H] <sup>+</sup> |
| Row 445#7  | C9H11N5O3   | 238.0918 | 11.57 | [M + H] <sup>+</sup> |
| Row 297#3  | C8H20N5O3   | 235.1649 | 8.77  | [M + H] <sup>+</sup> |

---

---

|            |            |          |       |                      |
|------------|------------|----------|-------|----------------------|
| Row 485#5  | C9H15NO6   | 234.0968 | 10.85 | [M + H] <sup>+</sup> |
| Row 332#3  | C9H15NO4S  | 234.0793 | 9.57  | [M + H] <sup>+</sup> |
| Row 353#10 | C9H15NO4S  | 234.0791 | 9.36  | [M + H] <sup>+</sup> |
| Row 278#0  | C9H19N4O3  | 232.1544 | 6.53  | [M + H] <sup>+</sup> |
| Row 234#6  | C9H19N4O3  | 232.1542 | 6.29  | [M + H] <sup>+</sup> |
| Row 372#7  | C8H16N5O3  | 231.1335 | 10.12 | [M + H] <sup>+</sup> |
| Row 443#3  | C9H15N3O4  | 230.1135 | 11.60 | [M + H] <sup>+</sup> |
| Row 429#7  | C9H15N3O4  | 230.1133 | 11.38 | [M + H] <sup>+</sup> |
| Row 268#6  | C9H18N5O2  | 229.1545 | 7.58  | [M + H] <sup>+</sup> |
| Row 381#4  | C9H18N5O2  | 229.1544 | 10.67 | [M + H] <sup>+</sup> |
| Row 288#4  | C9H18N5O2  | 229.1543 | 7.50  | [M + H] <sup>+</sup> |
| Row 266#9  | C8H14N6O2  | 227.1246 | 6.91  | [M + H] <sup>+</sup> |
| Row 156#1  | C6H15N4O3P | 223.0964 | 4.55  | [M + H] <sup>+</sup> |
| Row 156#10 | C6H15N4O3P | 223.0961 | 4.46  | [M + H] <sup>+</sup> |
| Row 346#3  | C9H11N5O2  | 222.0970 | 9.88  | [M + H] <sup>+</sup> |
| Row 207#3  | C9H17NO5   | 220.1178 | 5.88  | [M + H] <sup>+</sup> |
| Row 187#6  | C8H13NO4S  | 220.0636 | 5.03  | [M + H] <sup>+</sup> |
| Row 242#6  | C7H11N3O3S | 218.0593 | 6.60  | [M + H] <sup>+</sup> |
| Row 300#2  | C7H11N3O3S | 218.0591 | 6.49  | [M + H] <sup>+</sup> |
| Row 367#4  | C8H15N4O3  | 216.1227 | 10.28 | [M + H] <sup>+</sup> |
| Row 641#7  | C8H9NO2PS  | 215.0161 | 15.53 | [M + H] <sup>+</sup> |
| Row 714#2  | C6H4N3O6   | 215.0159 | 15.43 | [M + H] <sup>+</sup> |
| Row 284#10 | C8H19NO3S  | 210.1140 | 7.24  | [M + H] <sup>+</sup> |
| Row 687#6  | C7H7N5O3   | 210.0609 | 15.56 | [M + H] <sup>+</sup> |
| Row 715#1  | C7H7N5O3   | 210.0608 | 15.48 | [M + H] <sup>+</sup> |
| Row 184#3  | C9H12N4O2  | 209.1017 | 5.24  | [M + H] <sup>+</sup> |
| Row 211#10 | C9H19O5    | 208.1324 | 5.35  | [M + H] <sup>+</sup> |
| Row 183#7  | C9H9N4O2   | 206.0809 | 4.97  | [M + H] <sup>+</sup> |
| Row 509#5  | C7H11NO4S  | 206.0478 | 11.19 | [M + H] <sup>+</sup> |
| Row 306#3  | C9H10N5O   | 205.0968 | 8.97  | [M + H] <sup>+</sup> |
| Row 503#5  | C9H15O5    | 204.0976 | 11.09 | [M + H] <sup>+</sup> |
| Row 347#6  | C9H9N5O    | 204.0866 | 9.51  | [M + H] <sup>+</sup> |
| Row 366#9  | C9H9N5O    | 204.0864 | 9.45  | [M + H] <sup>+</sup> |
| Row 726#4  | C8H18N4O2  | 203.1499 | 19.82 | [M + H] <sup>+</sup> |
| Row 372#3  | C9H18N2O3  | 203.1388 | 10.55 | [M + H] <sup>+</sup> |
| Row 361#4  | C9H18N2O3  | 203.1387 | 10.33 | [M + H] <sup>+</sup> |
| Row 276#9  | C9H21N4O   | 202.1798 | 7.10  | [M + H] <sup>+</sup> |
| Row 209#10 | C9H21N4O   | 202.1797 | 5.30  | [M + H] <sup>+</sup> |
| Row 304#9  | C9H17N3S   | 200.1214 | 7.99  | [M + H] <sup>+</sup> |
| Row 531#5  | C6H15NO6   | 198.0968 | 11.49 | [M + H] <sup>+</sup> |
| Row 516#0  | C8H11N3O3  | 198.0874 | 11.55 | [M + H] <sup>+</sup> |
| Row 110#3  | C7H7N3O4   | 198.0523 | 4.21  | [M + H] <sup>+</sup> |
| Row 132#9  | C9H14N4O   | 195.1223 | 4.23  | [M + H] <sup>+</sup> |
| Row 478#9  | C7H6N4OS   | 195.0319 | 11.78 | [M + H] <sup>+</sup> |

---

---

|            |           |          |       |                      |
|------------|-----------|----------|-------|----------------------|
| Row 420#6  | C8H22N2OP | 194.1538 | 11.07 | [M + H] <sup>+</sup> |
| Row 336#0  | C8H16O3S  | 193.0877 | 7.59  | [M + H] <sup>+</sup> |
| Row 267#3  | C8H16O3S  | 193.0875 | 7.46  | [M + H] <sup>+</sup> |
| Row 118#4  | C9H21NO3  | 192.1590 | 4.03  | [M + H] <sup>+</sup> |
| Row 360#4  | C9H13N5   | 192.1225 | 10.13 | [M + H] <sup>+</sup> |
| Row 484#7  | C6H9NO4S  | 192.0321 | 12.18 | [M + H] <sup>+</sup> |
| Row 749#4  | C8H10N6   | 191.1022 | 23.03 | [M + H] <sup>+</sup> |
| Row 726#10 | C9H20N2O2 | 189.1594 | 20.52 | [M + H] <sup>+</sup> |
| Row 758#10 | C9H18NO3  | 189.1342 | 25.16 | [M + H] <sup>+</sup> |
| Row 201#6  | C8H16N2O3 | 189.1233 | 5.62  | [M + H] <sup>+</sup> |
| Row 337#7  | C9H17NO3  | 188.1277 | 9.23  | [M + H] <sup>+</sup> |
| Row 223#7  | C9H7N4O   | 188.0703 | 5.99  | [M + H] <sup>+</sup> |
| Row 353#5  | C9H15NO3  | 186.1122 | 8.34  | [M + H] <sup>+</sup> |
| Row 322#4  | C9H15NO3  | 186.1121 | 9.21  | [M + H] <sup>+</sup> |
| Row 502#3  | C9H16NOP  | 186.1057 | 12.30 | [M + H] <sup>+</sup> |
| Row 283#7  | C9H13O4   | 186.0869 | 7.45  | [M + H] <sup>+</sup> |
| Row 348#6  | C8H11NO4  | 186.0760 | 9.51  | [M + H] <sup>+</sup> |
| Row 470#2  | C4H11NO7  | 186.0619 | 10.66 | [M + H] <sup>+</sup> |
| Row 621#0  | C9H11O4   | 184.0733 | 12.95 | [M + H] <sup>+</sup> |
| Row 134#6  | C7H8N4O2  | 181.0718 | 4.51  | [M + H] <sup>+</sup> |
| Row 136#1  | C9H10NO3  | 181.0718 | 4.45  | [M + H] <sup>+</sup> |
| Row 131#8  | C9H9NO3   | 180.0655 | 4.44  | [M + H] <sup>+</sup> |
| Row 209#9  | C6H13NOP2 | 178.0530 | 5.31  | [M + H] <sup>+</sup> |
| Row 359#3  | C8H17NO3  | 176.1278 | 10.17 | [M + H] <sup>+</sup> |
| Row 562#9  | C8H15O4   | 176.1026 | 13.27 | [M + H] <sup>+</sup> |
| Row 224#10 | C8H7N4O   | 176.0703 | 5.59  | [M + H] <sup>+</sup> |
| Row 277#6  | C8H18N2O2 | 175.1439 | 7.79  | [M + H] <sup>+</sup> |
| Row 692#7  | C8H18N2O2 | 175.1438 | 19.11 | [M + H] <sup>+</sup> |
| Row 780#5  | C8H16NO3  | 175.1186 | 24.23 | [M + H] <sup>+</sup> |
| Row 355#8  | C7H14N2O3 | 175.1077 | 9.44  | [M + H] <sup>+</sup> |
| Row 427#6  | C7H14N2O3 | 175.1075 | 11.21 | [M + H] <sup>+</sup> |
| Row 111#6  | C9H19NO2  | 174.1487 | 4.06  | [M + H] <sup>+</sup> |
| Row 241#10 | C8H12O4   | 173.0805 | 6.10  | [M + H] <sup>+</sup> |
| Row 126#6  | C9H17NO2  | 172.1331 | 4.29  | [M + H] <sup>+</sup> |
| Row 386#3  | C9H17NO2  | 172.1330 | 10.55 | [M + H] <sup>+</sup> |
| Row 382#7  | C9H17NO2  | 172.1329 | 10.37 | [M + H] <sup>+</sup> |
| Row 835#2  | C9H18N2O  | 171.1489 | 23.99 | [M + H] <sup>+</sup> |
| Row 27#7   | C8H16N3O  | 171.1377 | 2.98  | [M + H] <sup>+</sup> |
| Row 254#1  | C7H10N2O3 | 171.0762 | 6.19  | [M + H] <sup>+</sup> |
| Row 201#0  | C9H15NO2  | 170.1175 | 4.72  | [M + H] <sup>+</sup> |
| Row 487#0  | C9H13O3   | 170.0923 | 10.89 | [M + H] <sup>+</sup> |
| Row 349#3  | C9H13O3   | 170.0921 | 10.07 | [M + H] <sup>+</sup> |
| Row 260#5  | C7H10N2OP | 170.0598 | 6.03  | [M + H] <sup>+</sup> |
| Row 711#7  | C6H10N5O  | 169.0945 | 22.98 | [M + H] <sup>+</sup> |

---

---

|            |           |          |       |                      |
|------------|-----------|----------|-------|----------------------|
| Row 230#0  | C7H8N2O3  | 169.0606 | 5.17  | [M + H] <sup>+</sup> |
| Row 455#5  | C5H4N4O3  | 169.0354 | 10.31 | [M + H] <sup>+</sup> |
| Row 410#9  | C7H6NO4   | 169.0352 | 10.78 | [M + H] <sup>+</sup> |
| Row 231#3  | C9H11NO2  | 166.0860 | 6.59  | [M + H] <sup>+</sup> |
| Row 251#4  | C9H11NO2  | 166.0859 | 6.47  | [M + H] <sup>+</sup> |
| Row 126#9  | C7H8N4O   | 165.0755 | 4.13  | [M + H] <sup>+</sup> |
| Row 375#4  | C9H8O3    | 165.0544 | 10.39 | [M + H] <sup>+</sup> |
| Row 359#8  | C7H15NO3  | 162.1124 | 9.54  | [M + H] <sup>+</sup> |
| Row 327#4  | C7H15NO3  | 162.1121 | 9.31  | [M + H] <sup>+</sup> |
| Row 223#8  | C7H7N5    | 162.0760 | 5.57  | [M + H] <sup>+</sup> |
| Row 131#10 | C6H13NP2  | 162.0580 | 4.25  | [M + H] <sup>+</sup> |
| Row 739#10 | C7H16N2O2 | 161.1280 | 21.77 | [M + H] <sup>+</sup> |
| Row 208#6  | C6H9O3P   | 161.0377 | 5.77  | [M + H] <sup>+</sup> |
| Row 275#0  | C8H17NO2  | 160.1331 | 6.16  | [M + H] <sup>+</sup> |
| Row 337#3  | C7H13NO3  | 160.0966 | 9.78  | [M + H] <sup>+</sup> |
| Row 198#2  | C6H9NO2S  | 160.0423 | 4.62  | [M + H] <sup>+</sup> |
| Row 319#4  | C6H13N3P  | 159.0913 | 8.88  | [M + H] <sup>+</sup> |
| Row 551#10 | C6H10N2O3 | 159.0760 | 13.16 | [M + H] <sup>+</sup> |
| Row 256#3  | C7H10O4   | 159.0650 | 7.37  | [M + H] <sup>+</sup> |
| Row 235#6  | C8H15NO2  | 158.1174 | 6.24  | [M + H] <sup>+</sup> |
| Row 520#7  | C8H11O3   | 156.0764 | 12.92 | [M + H] <sup>+</sup> |
| Row 466#7  | C8H11O3   | 156.0764 | 11.83 | [M + H] <sup>+</sup> |
| Row 297#1  | C8H11O3   | 156.0764 | 6.83  | [M + H] <sup>+</sup> |
| Row 208#7  | C8H9O3    | 154.0610 | 5.65  | [M + H] <sup>+</sup> |
| Row 170#3  | CH8N5O2P  | 154.0495 | 5.04  | [M + H] <sup>+</sup> |
| Row 218#5  | CH9N6OP   | 153.0655 | 5.08  | [M + H] <sup>+</sup> |
| Row 204#8  | C7H10N4   | 151.0963 | 5.04  | [M + H] <sup>+</sup> |
| Row 311#6  | C9H10P    | 150.0581 | 8.84  | [M + H] <sup>+</sup> |
| Row 347#7  | C6H13NO3  | 148.0964 | 9.49  | [M + H] <sup>+</sup> |
| Row 335#4  | C6H13NO3  | 148.0964 | 9.50  | [M + H] <sup>+</sup> |
| Row 473#7  | C6H5N5    | 148.0600 | 11.91 | [M + H] <sup>+</sup> |
| Row 155#8  | C9H8P     | 148.0425 | 4.56  | [M + H] <sup>+</sup> |
| Row 741#10 | C6H14N2O2 | 147.1123 | 22.87 | [M + H] <sup>+</sup> |
| Row 513#10 | C5H10N2O3 | 147.0759 | 12.29 | [M + H] <sup>+</sup> |
| Row 437#8  | C7H15NO2  | 146.1175 | 11.20 | [M + H] <sup>+</sup> |
| Row 352#3  | C6H11NO3  | 146.0808 | 10.07 | [M + H] <sup>+</sup> |
| Row 232#4  | C9H7NO    | 146.0597 | 5.99  | [M + H] <sup>+</sup> |
| Row 181#6  | C5H9NP2   | 146.0267 | 4.93  | [M + H] <sup>+</sup> |
| Row 290#6  | C6H8O4    | 145.0492 | 8.52  | [M + H] <sup>+</sup> |
| Row 313#10 | C6H8O4    | 145.0491 | 8.34  | [M + H] <sup>+</sup> |
| Row 225#6  | C6H8O2S   | 145.0315 | 6.05  | [M + H] <sup>+</sup> |
| Row 282#8  | H6N3O6    | 145.0315 | 6.82  | [M + H] <sup>+</sup> |
| Row 695#7  | C8H17NO   | 144.1380 | 20.57 | [M + H] <sup>+</sup> |
| Row 291#4  | C7H13NO2  | 144.1015 | 7.94  | [M + H] <sup>+</sup> |

---

---

|            |           |          |       |                      |
|------------|-----------|----------|-------|----------------------|
| Row 219#3  | C6H12N2P  | 144.0805 | 6.22  | [M + H] <sup>+</sup> |
| Row 354#0  | C7H11NO2  | 142.0861 | 7.88  | [M + H] <sup>+</sup> |
| Row 233#1  | C7H11NO2  | 142.0860 | 5.69  | [M + H] <sup>+</sup> |
| Row 810#2  | C7H11NO2  | 142.0859 | 21.80 | [M + H] <sup>+</sup> |
| Row 276#1  | C6H8N2O2  | 141.0655 | 6.69  | [M + H] <sup>+</sup> |
| Row 317#3  | H7N7S     | 138.0547 | 9.22  | [M + H] <sup>+</sup> |
| Row 314#5  | C7H6NO2   | 137.0454 | 7.21  | [M + H] <sup>+</sup> |
| Row 382#3  | C8H9NO    | 136.0754 | 10.51 | [M + H] <sup>+</sup> |
| Row 371#4  | C8H9NO    | 136.0754 | 10.39 | [M + H] <sup>+</sup> |
| Row 770#1  | C7H7N2O   | 136.0615 | 17.12 | [M + H] <sup>+</sup> |
| Row 261#7  | CH8N6P    | 136.0614 | 6.66  | [M + H] <sup>+</sup> |
| Row 585#10 | CH8N6P    | 136.0614 | 13.94 | [M + H] <sup>+</sup> |
| Row 545#4  | CH8N6P    | 136.0614 | 12.88 | [M + H] <sup>+</sup> |
| Row 756#10 | CH8N6P    | 136.0614 | 24.72 | [M + H] <sup>+</sup> |
| Row 163#6  | C8H7NO    | 134.0598 | 4.79  | [M + H] <sup>+</sup> |
| Row 191#3  | C8H6P     | 134.0268 | 5.54  | [M + H] <sup>+</sup> |
| Row 698#7  | C5H12N2O2 | 133.0969 | 20.62 | [M + H] <sup>+</sup> |
| Row 763#6  | C5H12N2O2 | 133.0969 | 20.47 | [M + H] <sup>+</sup> |
| Row 553#8  | C4H8N2O3  | 133.0605 | 12.64 | [M + H] <sup>+</sup> |
| Row 305#6  | C6H13NO2  | 132.1016 | 8.69  | [M + H] <sup>+</sup> |
| Row 494#4  | C6H11O3   | 132.0763 | 12.05 | [M + H] <sup>+</sup> |
| Row 746#10 | C7H13O2   | 130.0971 | 23.98 | [M + H] <sup>+</sup> |
| Row 796#1  | C6H11NO2  | 130.0860 | 21.86 | [M + H] <sup>+</sup> |
| Row 329#1  | C6H11NO2  | 130.0860 | 8.50  | [M + H] <sup>+</sup> |
| Row 359#6  | C6H11NO2  | 130.0860 | 9.80  | [M + H] <sup>+</sup> |
| Row 705#7  | C6H11NO2  | 130.0860 | 22.98 | [M + H] <sup>+</sup> |
| Row 740#9  | C6H11NO2  | 130.0859 | 20.47 | [M + H] <sup>+</sup> |
| Row 724#10 | C6H11NO2  | 130.0859 | 20.52 | [M + H] <sup>+</sup> |
| Row 548#8  | C5H7NO3   | 130.0497 | 12.59 | [M + H] <sup>+</sup> |
| Row 494#7  | C5H7NO3   | 130.0495 | 12.33 | [M + H] <sup>+</sup> |
| Row 360#2  | C5H7NO3   | 130.0495 | 7.42  | [M + H] <sup>+</sup> |
| Row 491#7  | C5H8N2O2  | 129.0656 | 12.25 | [M + H] <sup>+</sup> |
| Row 714#7  | C7H12NO   | 127.0975 | 24.16 | [M + H] <sup>+</sup> |
| Row 512#10 | CH9N3PS   | 127.0322 | 12.14 | [M + H] <sup>+</sup> |
| Row 500#9  | H5N4O2S   | 126.0216 | 11.97 | [M + H] <sup>+</sup> |
| Row 353#4  | C8H11O    | 124.0864 | 9.94  | [M + H] <sup>+</sup> |
| Row 160#3  | H7N6P     | 123.0549 | 4.89  | [M + H] <sup>+</sup> |
| Row 332#0  | C8H9N     | 120.0806 | 7.64  | [M + H] <sup>+</sup> |
| Row 461#7  | C4H9NO3   | 120.0652 | 11.74 | [M + H] <sup>+</sup> |
| Row 328#6  | C4H8P2    | 119.0159 | 9.15  | [M + H] <sup>+</sup> |
| Row 340#3  | C5H11NO2  | 118.0859 | 9.91  | [M + H] <sup>+</sup> |
| Row 782#1  | C5H9NO2   | 116.0703 | 20.44 | [M + H] <sup>+</sup> |
| Row 197#6  | C5H9NO2   | 116.0703 | 5.23  | [M + H] <sup>+</sup> |
| Row 759#4  | C5H9NO2   | 116.0702 | 24.09 | [M + H] <sup>+</sup> |

---

---

|            |          |          |       |                      |
|------------|----------|----------|-------|----------------------|
| Row 729#10 | C5H9NO2  | 116.0702 | 20.67 | [M + H] <sup>+</sup> |
| Row 437#5  | C5H9NO2  | 116.0702 | 10.01 | [M + H] <sup>+</sup> |
| Row 742#9  | C5H10N2O | 115.0862 | 20.52 | [M + H] <sup>+</sup> |
| Row 534#7  | C5H8N2O  | 113.0706 | 13.21 | [M + H] <sup>+</sup> |
| Row 498#6  | CH10N4P  | 110.0710 | 11.97 | [M + H] <sup>+</sup> |

---
